# Supplementary material for: The premolten layer of ice next to a hydrophilic solid surface: correlating adhesion with molecular properties
Source: Royal Society of Chemistry journal article supplement (doi:10.1039/c6cp05303c), 2016-11-23
Supplement: c6cp05303c1.pdf [file c6cp05303c1.pdf]

# The premolten layer of ice next to a hydrophilic solid surface: correlating adhesion with molecular properties

*Jonathan F. D. Liljebblad, István Furó, Eric Tyrode\**

Department of Chemistry, School of Chemical Science and Engineering, KTH Royal Institute  
of Technology, SE-100 44 Stockholm, Sweden

\* Corresponding author: tyrode@kth.se. Telephone: +46 8 7909915

## Electronic Supporting Information

**ESI1:** Ice adhesion measuring device. Page 2

**ESI2:** Ice spectroscopy cell. Page 3

**ESI3:** TIR Raman spectra of bulk H<sub>2</sub>O ice. Page 4

**ESI4.** TIR Raman spectra of D<sub>2</sub>O ice. Page 6

**ESI5.** Additional VSFS spectra collected under the SPS polarization combination. Page 7

**ESI6.** Fresnel factor correction of VSF spectra. Page 8

**ESI7.** Fresnel factors corrected VSF spectra. Page 9

**ESI8.** Profilometer data. Page 12

**ESI9.** AFM. Page 13

**ESI10.** NMR. Page 15ø

**ESI11.** VSFS fitting parameters. Page 16.

\*Movie showing the sliding behavior during the adhesion measurement to be find in a separate document file in ESI.

**ESI1. Ice adhesion measurement device**

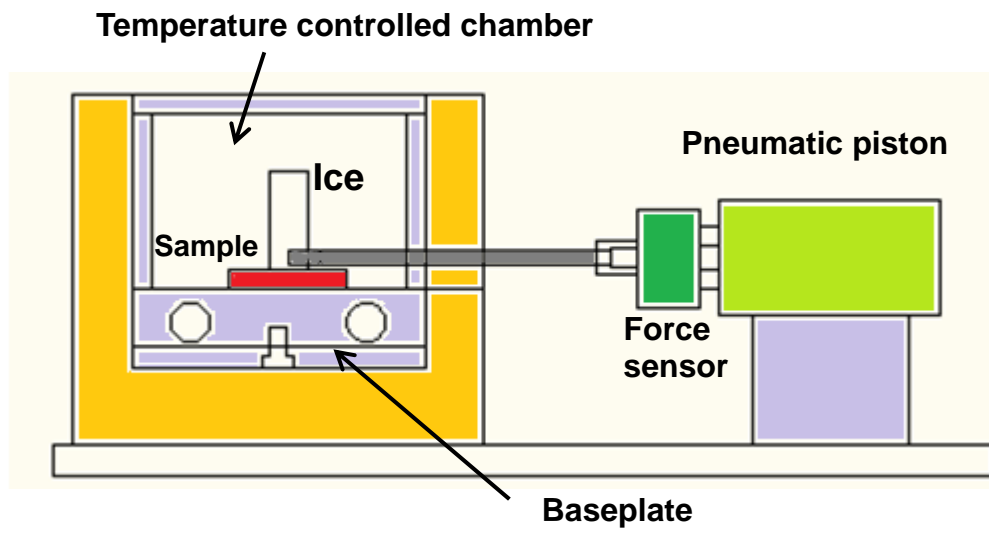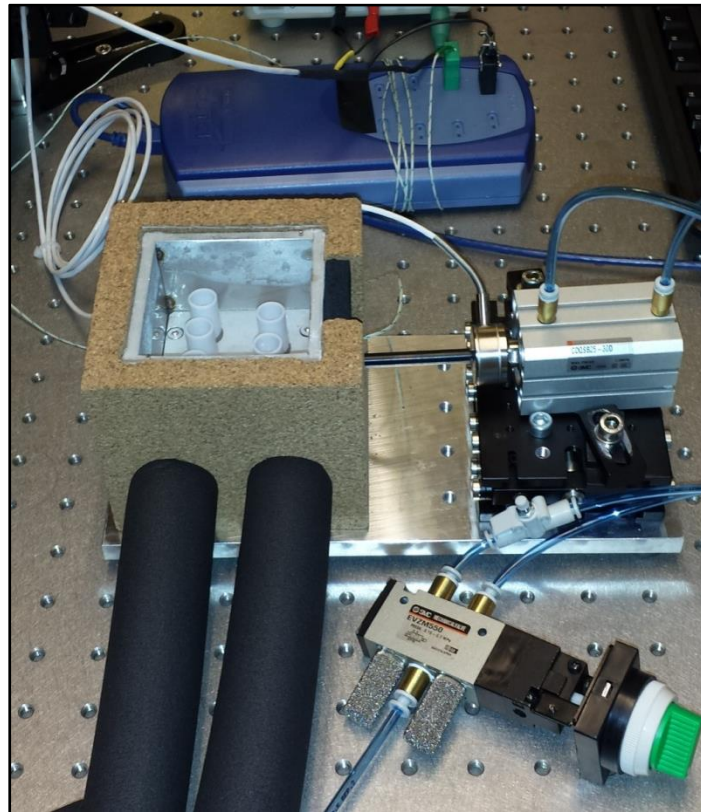

**Figure S1.** Schematic drawing and photograph showing the ice adhesion measurement device.

ESI2. Ice spectroscopy cell

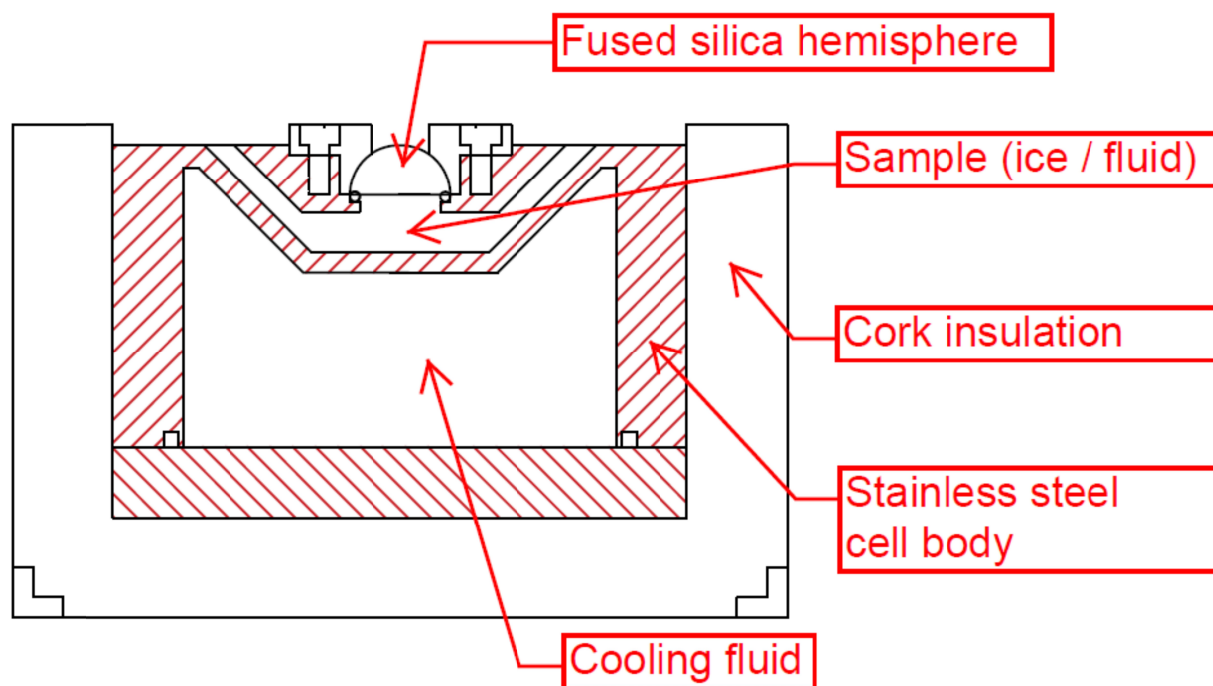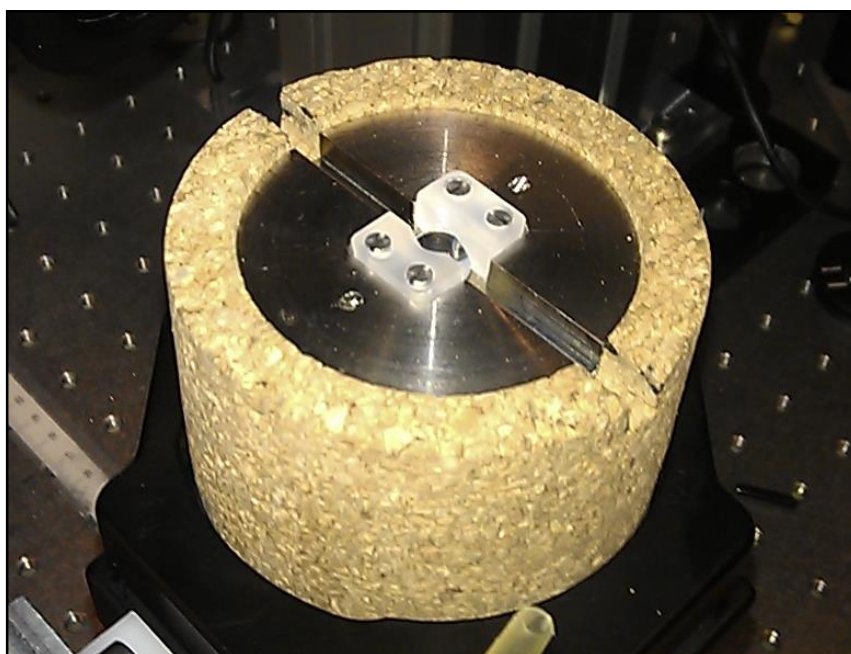

**Figure S2.** Schematic drawing and photograph showing the ice spectroscopy cell. When in use, the top part, except the slit where the laser beam enters, is covered with additional cork insulation.

### ESI3. TIR Raman spectra of bulk H<sub>2</sub>O ice

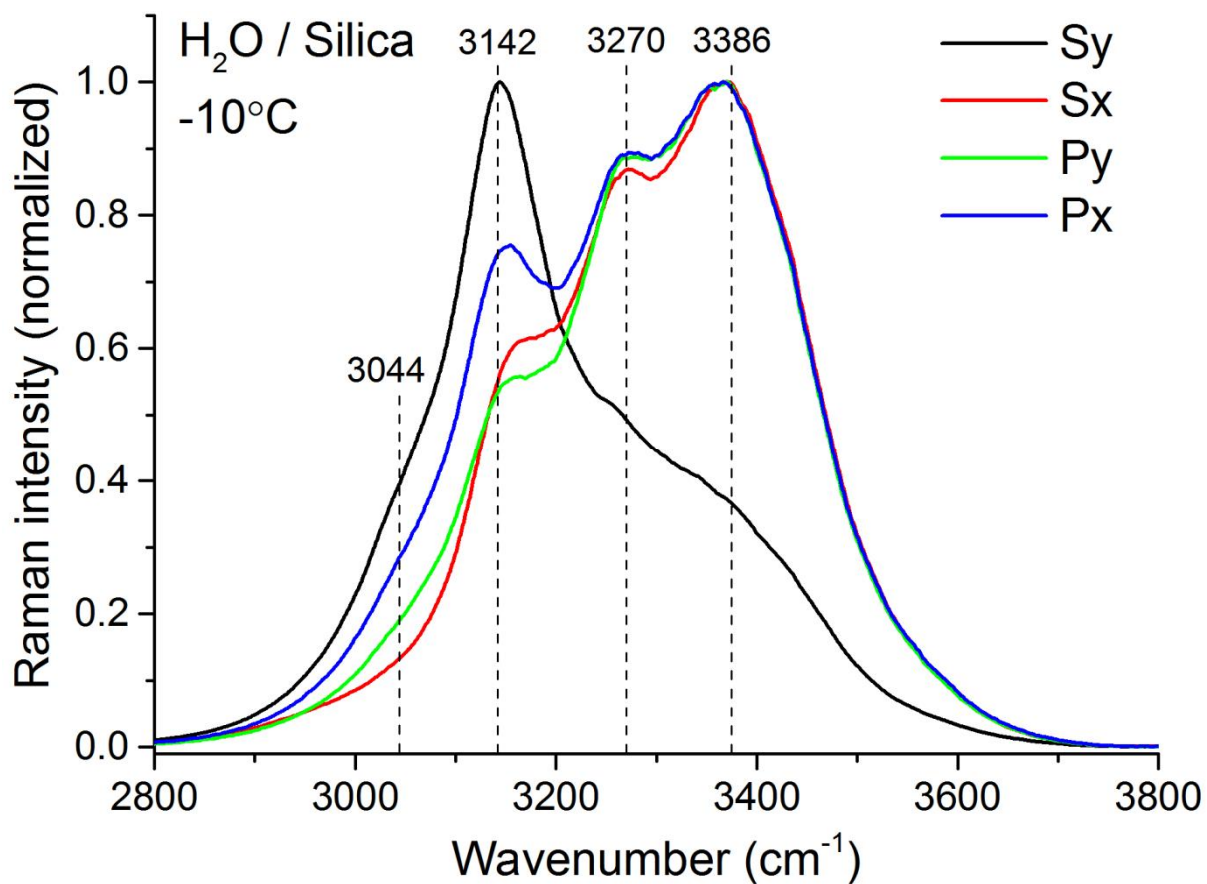

**Figure S3.** TIR Raman spectra recorded in four different polarization combinations (Sy, Sx, Py, and Px) of bulk H<sub>2</sub>O ice at -10°C. The spectra have been normalized so that the intensity of the highest intensity peak equals one. The peak positions are based on a fitting to Lorentzian line shape functions (see **Figure S4**).

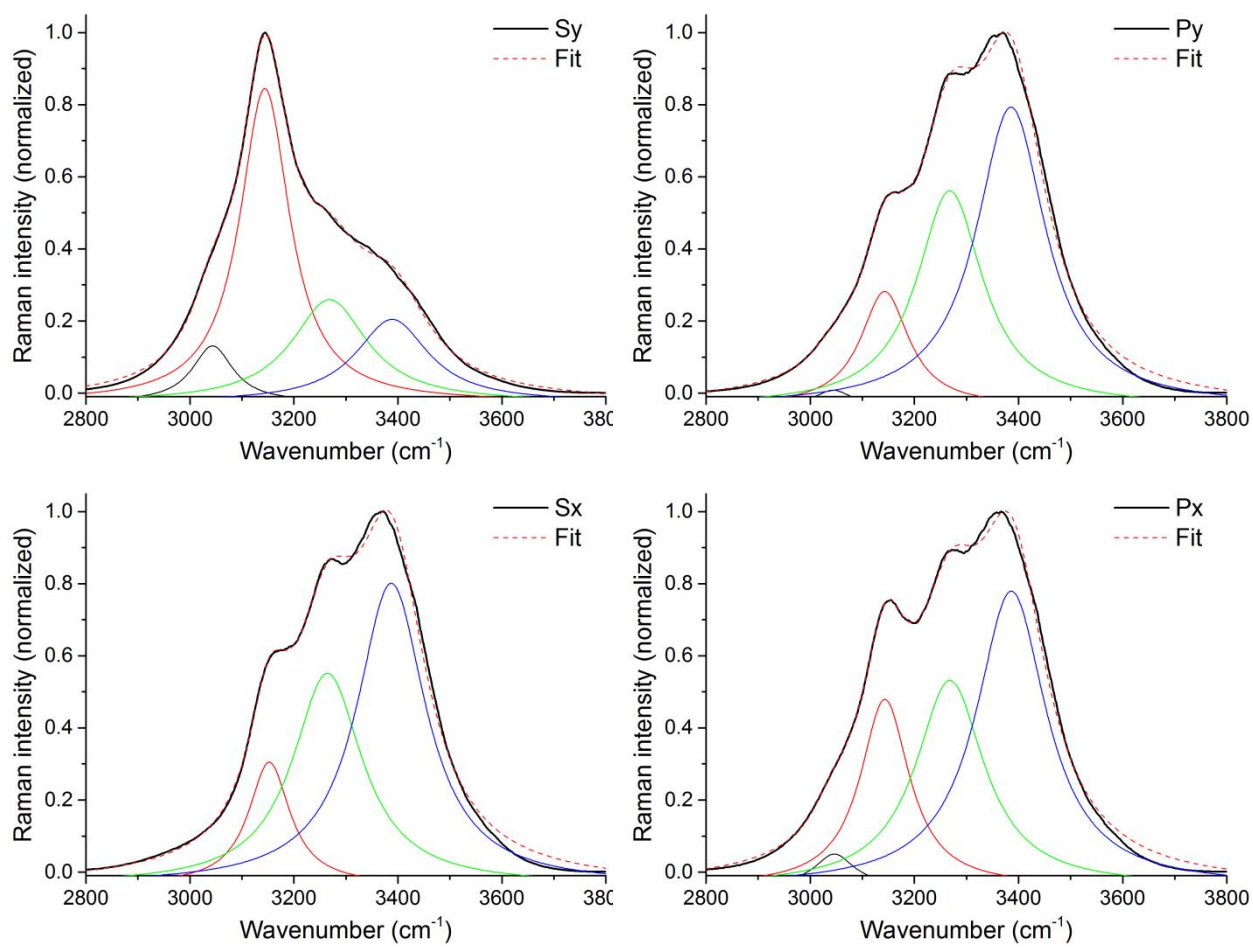

**Figure S4.** TIR Raman spectra of bulk H<sub>2</sub>O ice recorded at -10°C in the Sy, Sx, Py, and Px polarization combinations. The spectra were fitted with four Lorentzian line shape functions (colored lines), and the dashed line show the resulting fit. The Sx spectrum was fitted with only three peaks.

#### ESI4. TIR Raman spectra of D<sub>2</sub>O ice

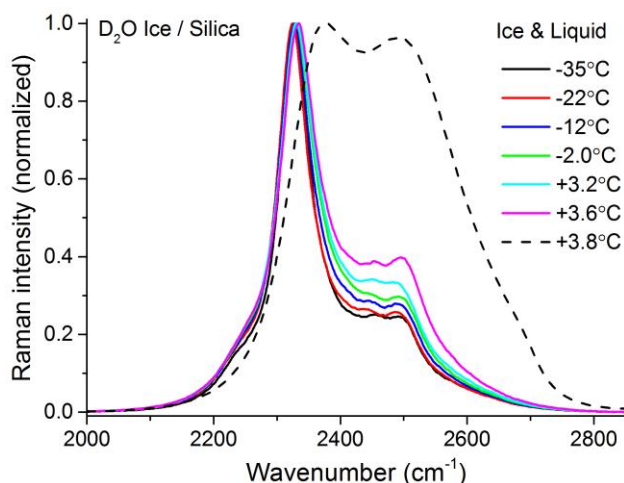

**Figure S5.** TIR Raman spectra (S<sub>y</sub>) of bulk D<sub>2</sub>O ice (melting temperature +3.8°C) at various temperatures ranging from -35°C to +3.6°C (solid lines) and liquid D<sub>2</sub>O at the melting temperature (dashed line). The ice spectra have been normalized to the peak at approximately 2330 cm<sup>-1</sup> and the water spectrum to the peak at approximately 2375 cm<sup>-1</sup>. Note that the spectrum of the liquid was collected under the polarization S<sub>x</sub>+S<sub>y</sub> (unpolarized collection).

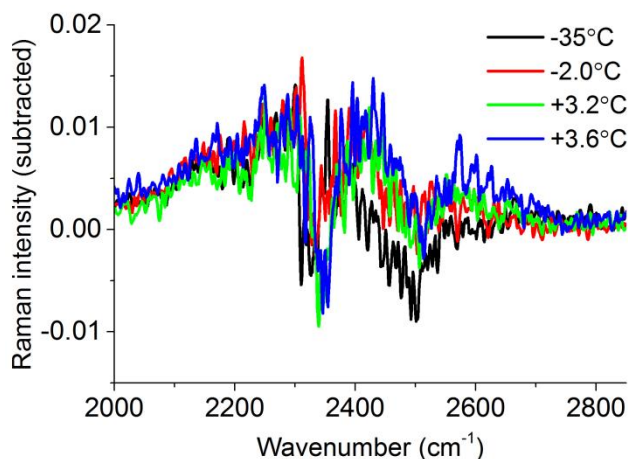

**Figure S6.** Surface contribution (subtraction of bulk spectrum from 100 nm spectrum for each temperature) of D<sub>2</sub>O ice at different temperatures. This figure is shown as an inset in Figure 4 in the main paper.



### ESI5. Additional VSFS spectra collected under the SPS polarization combination

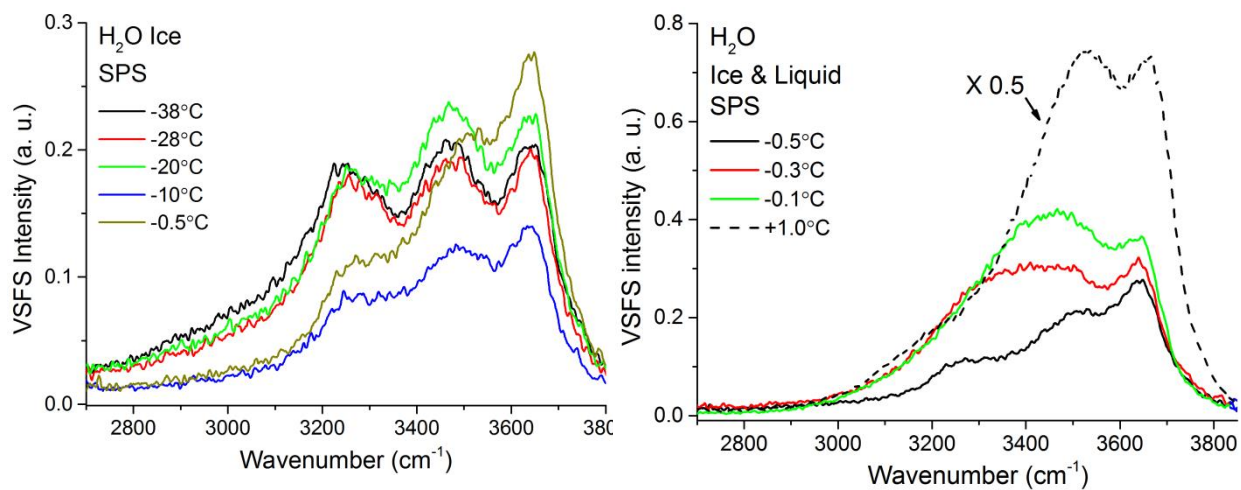

**Figure S7.** VSFS spectra recorded in the SPS polarization combination of H<sub>2</sub>O ice at low temperatures (left) and high temperatures (right). The SPS spectrum of liquid water is added as a reference.

## ESI6. Fresnel factor correction of VSF spectra

The angle of incidence of the visible and infrared beams chosen in a particular spectrometer, as well as the refractive indexes of the substances forming the interface under investigation, influences the wavenumber dependent intensity of the spectral features.<sup>1</sup> This is rarely accounted for when presenting VSFS data. **Figure S8** shows the curves used for normalizing the spectra to account for those factors, which has been calculating following the same principles as described in a previous publication,<sup>1</sup> invoking all angular and refractive index wavenumber dependents factors. To facilitate the calculations, Voight line-shape functions were fitted to the infrared refractive index data of liquid<sup>2</sup> H<sub>2</sub>O and H<sub>2</sub>O ice<sup>3</sup>, while a Sellmeier equation was used for the silica.<sup>4</sup> While the SSP and SPS polarization combinations only contain contributions from one susceptibility tensor element each (assuming  $C_{\infty}$ -symmetry of the interface), the PPP is an admixture of four tensor elements. In the curves for the spectral normalization only the zzz-element is included since it is expected to be substantially larger than the other elements.

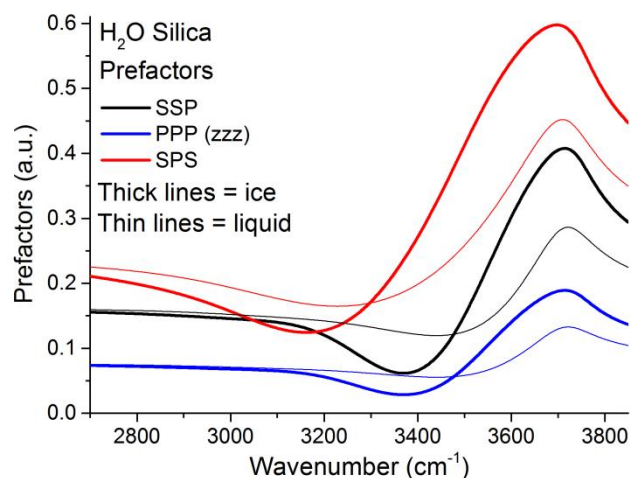

**Figure S8.** Curves used to normalize the recorded VSF spectra to account for Fresnel factors, as well as refractive index and angle of incidence wavenumber dependent intensity variations. Note, that because the purpose of the normalization was only to correct the shape of each individual spectrum, each curve was divided with its highest value to set it to one, and the intensity difference between the different polarization combinations was thus not taken into account.

<sup>1</sup> Liljeblad, J. F. D.; Tyrode, E. *Journal of Physical Chemistry C* **2012**, *116*, 22893.

<sup>2</sup> Max, J. J.; Chapados, C. *J Chem Phys* **2009**, *131*, 184505.

<sup>3</sup> Warren, S. G.; Brandt, R. E. *J Geophys Res-Atmos* **2008**, *113*.

<sup>4</sup> Malitson, I. H. *J. Opt. Soc. Am.* **1965**, *55*, 1205.



## ESI7. Fresnel factors corrected VSF spectra

The figures in this section corresponds to Figures 6, 7, and 8, in the main paper, which here have been corrected to account for the refractive index and experimental geometry dependent factors as described in the previous section. The number(s) within parenthesis after each figure number denotes the corresponding figure number in the main paper.

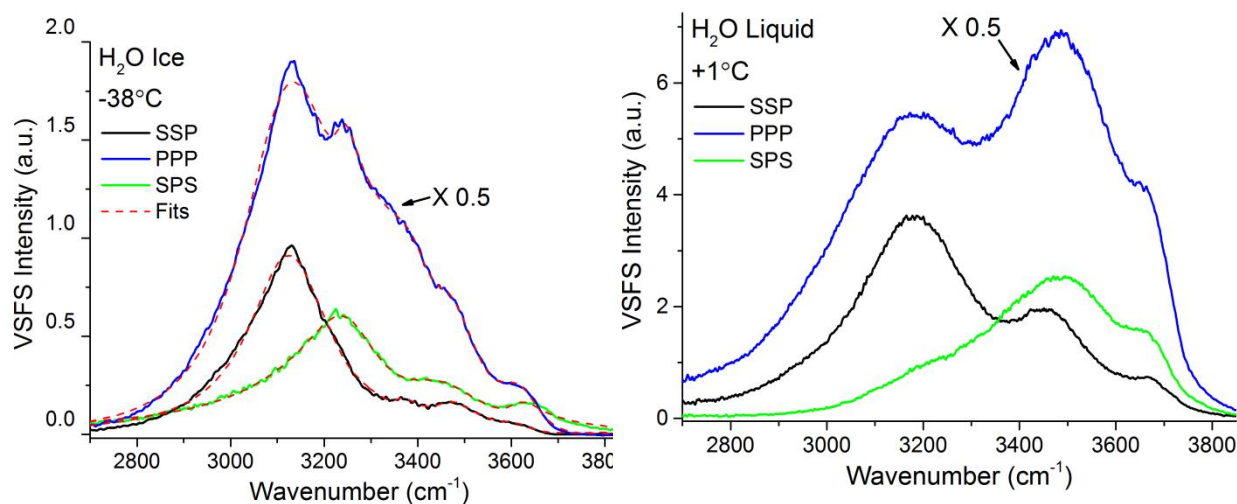

**Figure S9; (6a, 6b).** Fresnel factors corrected VSF spectra recorded in the SSP, PPP, and SPS polarization combinations of H<sub>2</sub>O ice at -38°C (left) and H<sub>2</sub>O liquid at +1°C (right). Note that the intensity in the PPP spectra has been divided by 2 for ease of comparison. Red dashed lines in Figure S9 (left) are fits to the spectra.

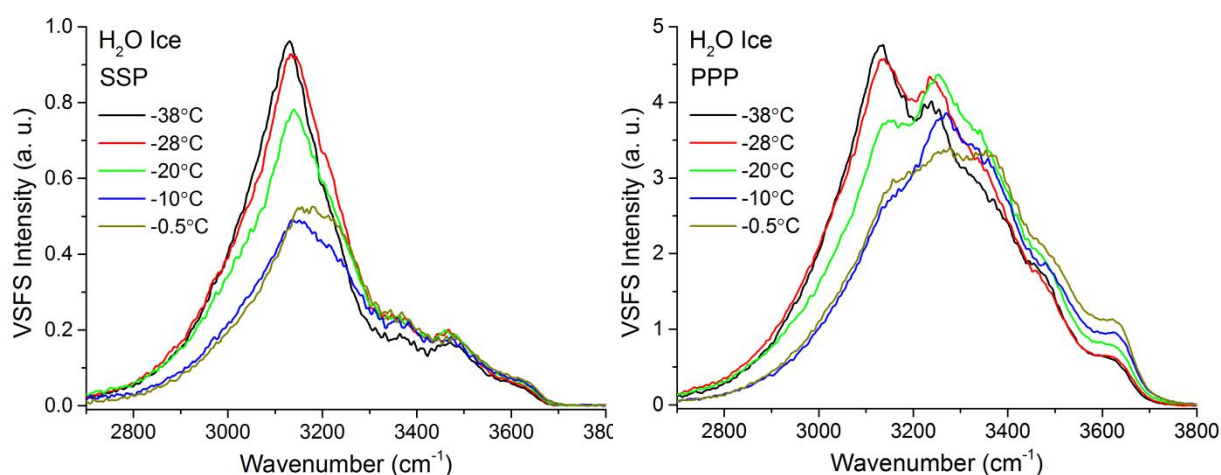

**Figure S10; (7a, 7b).** Fresnel factors corrected VSF spectra recorded in the SSP (left), and PPP (right) polarization combinations of H<sub>2</sub>O ice in contact with fused silica at various temperatures ranging from -38°C and -0.5°C.

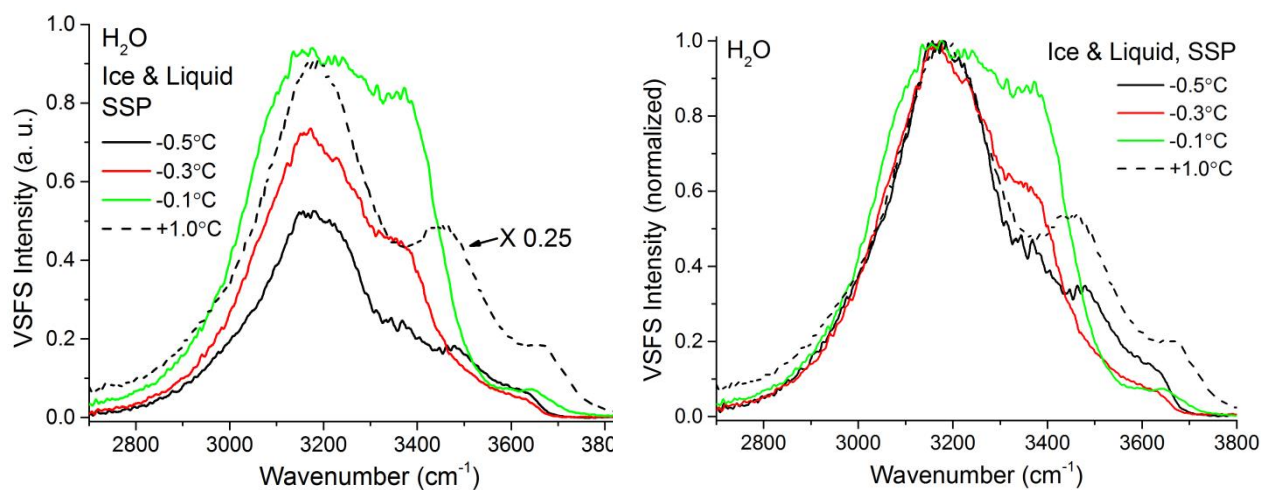

**Figure S11; (left 8).** **Left:** Fresnel factors corrected VSF spectra recorded in the SSP polarization combinations of H<sub>2</sub>O ice in contact with fused silica at various temperatures ranging from -0.5°C and -0.1°C. The corresponding Fresnel factor corrected spectrum for liquid water is also added for reference. **Right:** Same SSP spectra but normalized to the highest peak in the spectrum and where it is easier to appreciate changes in the relative spectral features upon increase of temperature.

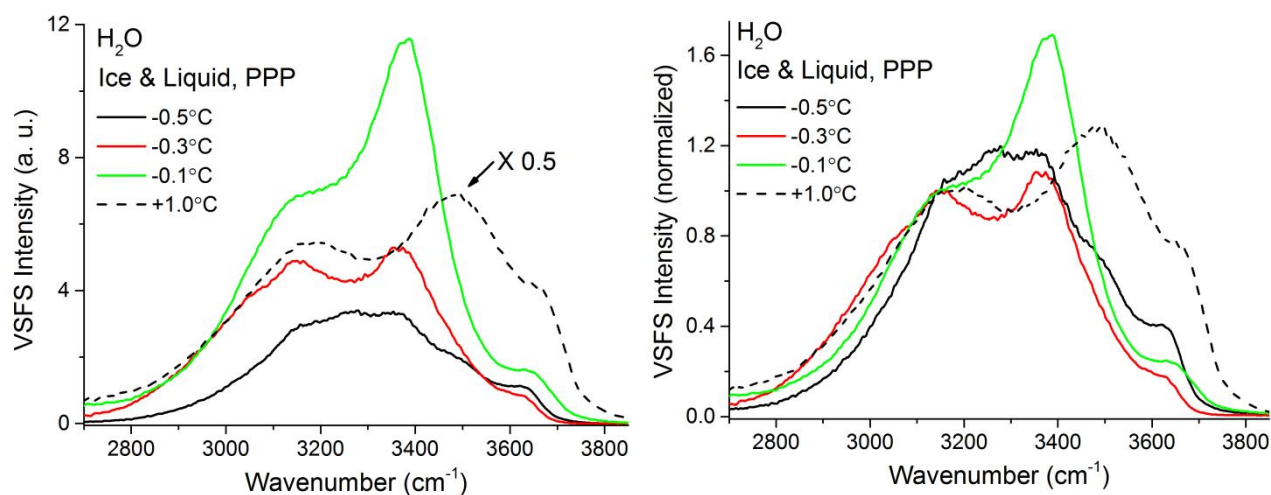

**Figure S12; (right 8).** **Left:** Fresnel factors corrected VSF spectra recorded in the PPP polarization combinations of H<sub>2</sub>O ice in contact with fused silica at various temperatures ranging from -0.5°C and -0.1°C. The corresponding Fresnel factor corrected spectrum for liquid water is also added for reference. **Right:** same PPP spectra but normalized to the ~3140 cm<sup>-1</sup> peak to better appreciate changes in the relative spectral features upon increase of temperature.

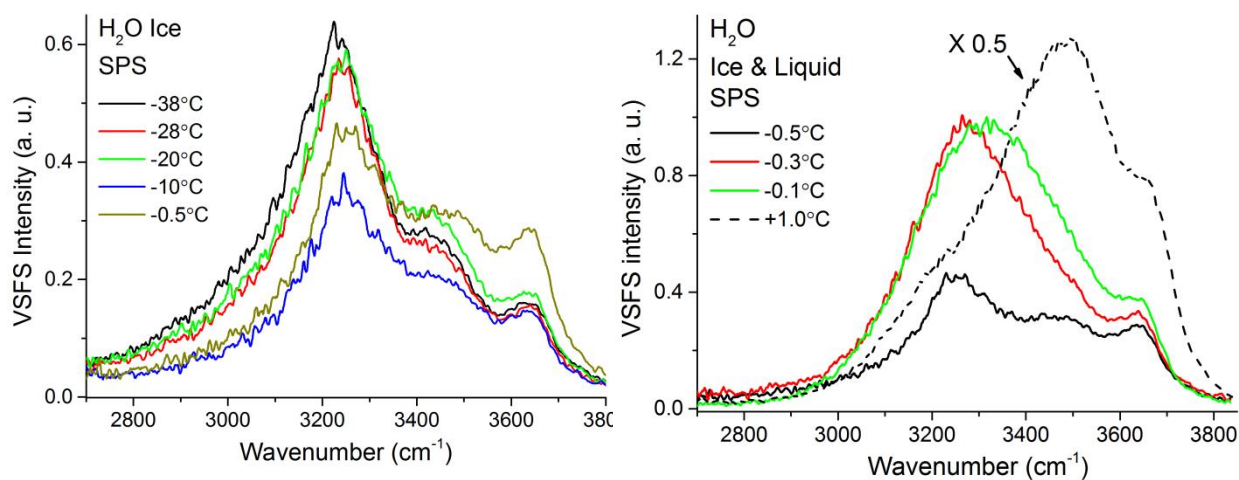

**Figure S13; (uncorrected data in Figure S7).** Fresnel factors corrected VSFS spectra recorded in the SPS polarization combinations of H<sub>2</sub>O ice in contact with fused silica at various temperatures ranging from -38°C and -0.5°C (left) and between -0.5°C and -0.1°C (right). The corresponding Fresnel factor corrected spectrum for liquid water is also added for reference (see dashed line on the spectra to the right).

## ESI8. Profilometry data

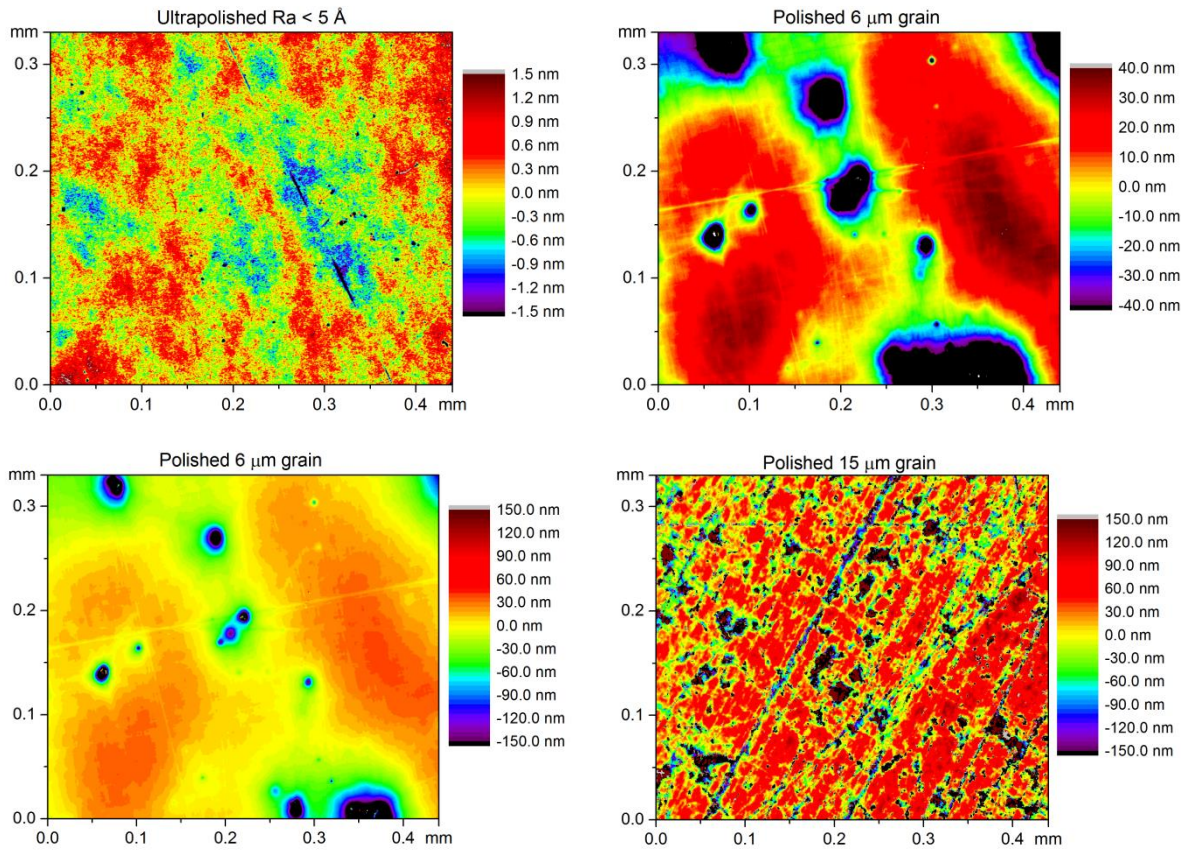

**Figure S14.** Profilometer-images of silica discs used for adhesion measurements. The top left image shows an as received ultra-polished silica disc ( $R_a < 4 \text{ \AA}$ ) after repeated ice adhesion measurements, the bottom right image shows a disc polished with 15  $\mu\text{m}$  grain sandpaper, and the remaining images (using different color scales) show a disc polished with 6  $\mu\text{m}$  grain size diamond paste after 15  $\mu\text{m}$  grain sandpaper.

**Table 1.** Roughness parameters extracted from the profilometer-images in Figure S14.

| <b>0.33 x 0.44 mm</b>              |                |                |
|------------------------------------|----------------|----------------|
|                                    | <b>Ra [nm]</b> | <b>Rq [nm]</b> |
| <b>As received</b>                 | 0.40           | 0.55           |
| <b>6 <math>\mu\text{m}</math></b>  | 22             | 38             |
| <b>15 <math>\mu\text{m}</math></b> | 80             | 190            |



## ESI9. AFM

Silica disc as received ( $R_a < 4 \text{ \AA}$ ) after adhesion measurements.

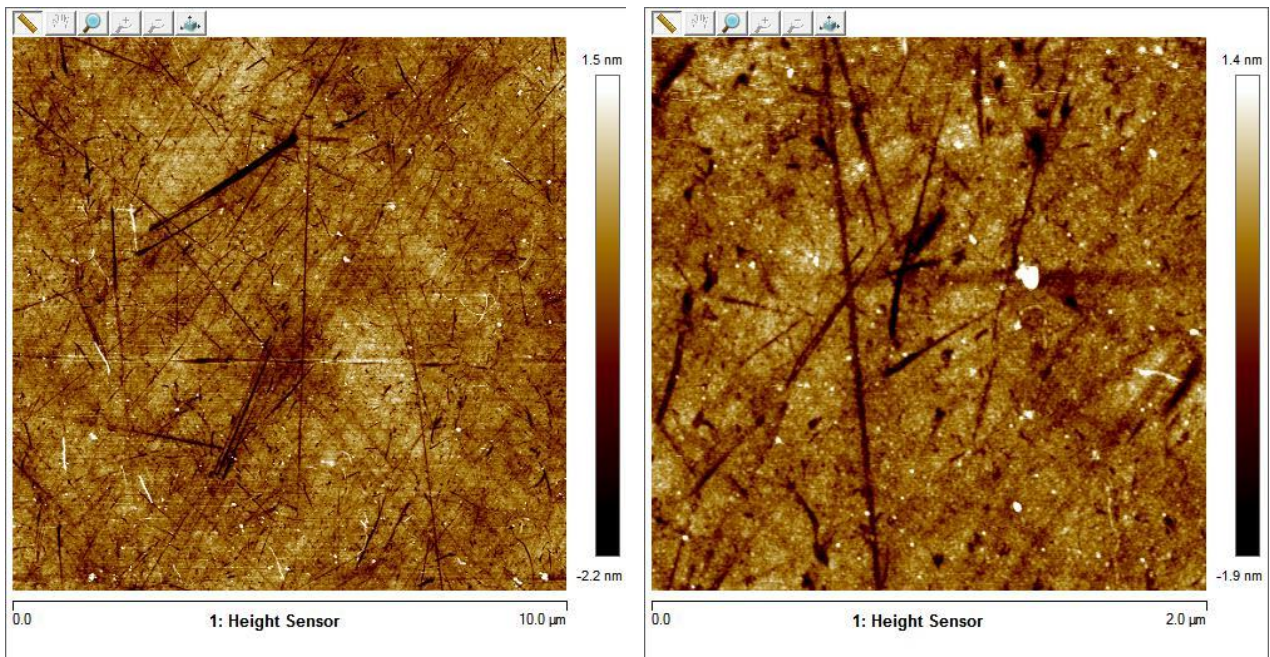

Silica disc polished with 6  $\mu\text{m}$  diamond paste after 15  $\mu\text{m}$  grain sandpaper.

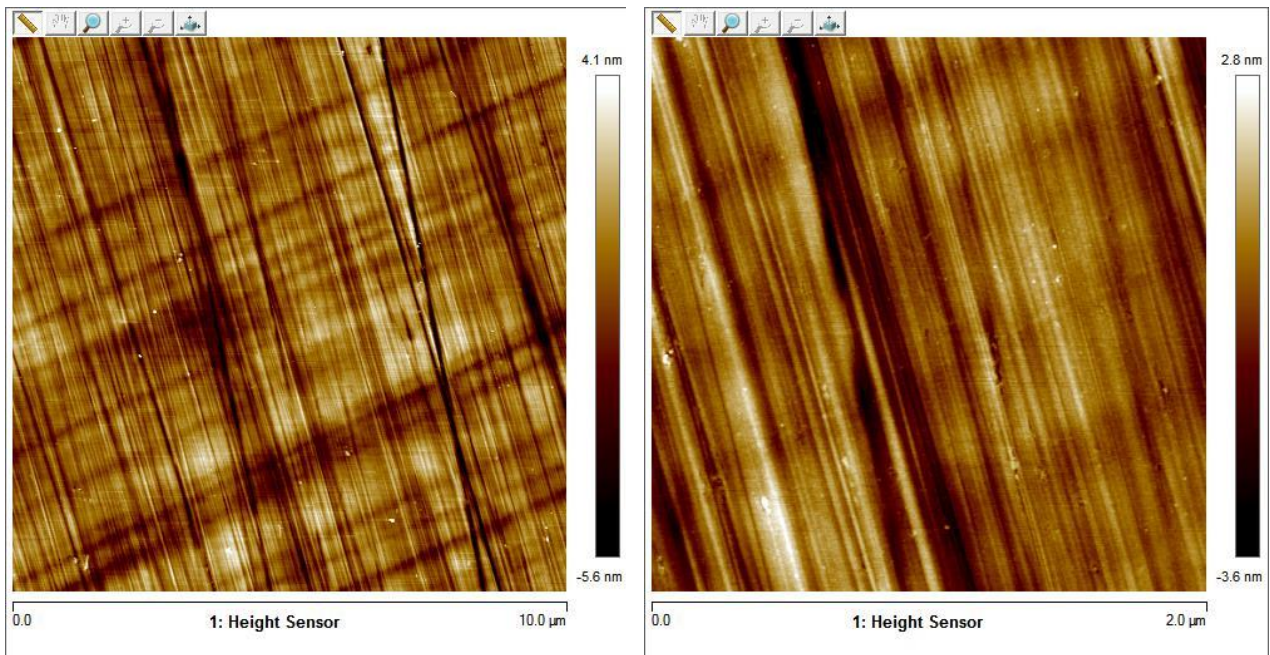

Silica disc polished with 15  $\mu\text{m}$  grain sandpaper

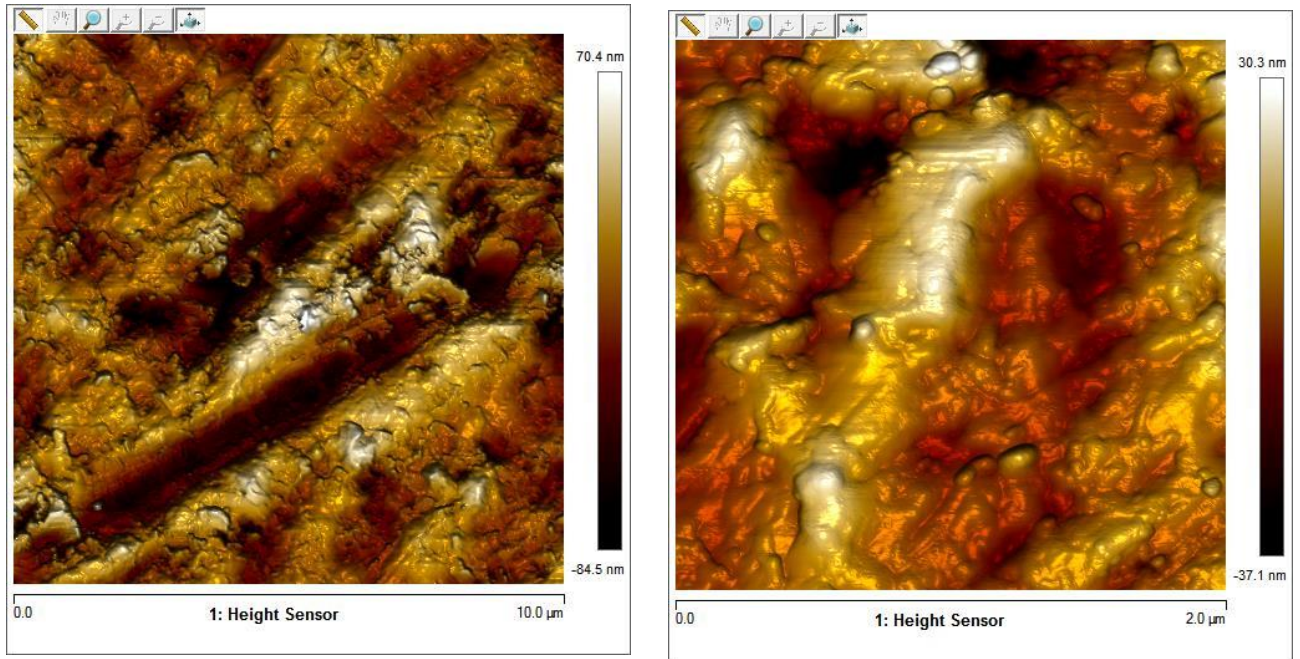

**Figure S15.** AFM-images of silica discs used for adhesion measurements. The left column shows 10 x 10  $\mu\text{m}$  images and the right column 2 x 2  $\mu\text{m}$  images. The top row shows as received ultra-polished silica discs ( $R_a < 4 \text{ \AA}$ ) after repeated ice adhesion measurements, the bottom row shows discs polished with 15  $\mu\text{m}$  grain sandpaper, and the middle row shows discs polished with 6  $\mu\text{m}$  grain size diamond paste after 15  $\mu\text{m}$  grain sandpaper.

**Table 2.** Roughness parameters extracted from the AFM-images in Figure S15.

|                                    | 10 x 10 $\mu\text{m}$ |            | 2 x 2 $\mu\text{m}$ |            |
|------------------------------------|-----------------------|------------|---------------------|------------|
|                                    | $R_a$ [nm]            | $R_q$ [nm] | $R_a$ [nm]          | $R_q$ [nm] |
| <b>As received</b>                 | 0.33                  | 0.49       | 0.29                | 0.45       |
| <b>6 <math>\mu\text{m}</math></b>  | 0.95                  | 1.3        | 0.66                | 0.87       |
| <b>15 <math>\mu\text{m}</math></b> | 16                    | 21         | 6.3                 | 8.4        |



## ESI10. NMR

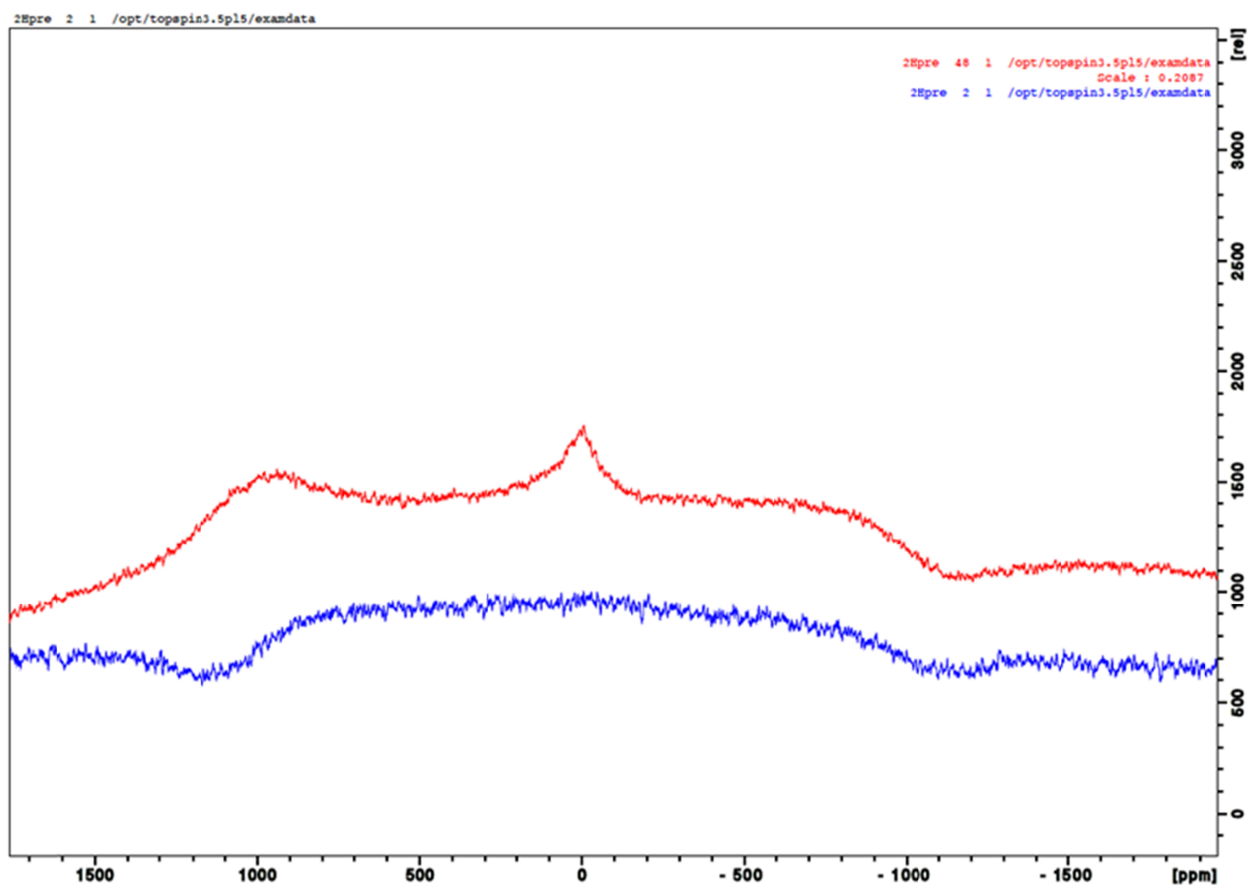

**Figure S18.** The  $^2\text{H}$  NMR spectrum of bulk  $\text{D}_2\text{O}$  ice (blue) and  $\text{D}_2\text{O}$  imbibed in the explored controlled pore glass, both recorded at  $-10^\circ\text{C}$  in a single-pulse experiment with *ca*  $11^\circ$  excitation pulse of 1 s pulse length. The intensity of the central peak (that is exclusive to the controlled pore glass sample at the different explored temperatures below the pore freezing point) is associated with the extent of the PML. The  $90^\circ$  edges of the broad  $^2\text{H}$  powder pattern that arises from solid ice are manifested as humps on the two sides.

## ESI11. SF fitting parameters

The parameters obtained from fitting the VSF spectra of ice to Equation (1) in the main paper are collected in the tables below (**Table S3 -**

**Table S5**). Before fitting, the spectra were corrected by division with the normalization curves (Fresnel factor corrections) in **Figure S8**. It must be stressed that given the large number of parameters (for instance  $3 \times 6 + 1$  for a spectrum fitted with six peaks) multiple local minima exist. Based on our practical experience, the presented parameters are not deemed to be a unique fit, nor necessarily representing a global minimum (i.e. the best possible fit) in the parameter space. The final result obtained from a particular fitting sequence depends on factors such as the starting guess, and the settings used in the Levenberg-Marquardt algorithm employed. In addition, parameters have sometimes been constrained to prevent unphysical, or otherways unreasonable, fitting results. Those constrained parameters are highlighted with italics in the tables.

As can be inferred from visual inspection of the spectra the peak widths ( $\Delta$ ) varies as the temperature of the ice changes. To enable comparisons of the intensities ( $A_n$ ) of individual peaks presented in Figure 9 in the main paper, they were corrected by dividing by the corresponding peak widths ( $\Delta_n$ ) as can be justified from Equation (79) in a review by Lambert et. al.<sup>5</sup>

---

<sup>5</sup> Lambert, A. G.; Davies, P. B.; Neivandt, D. J. *Applied Spectroscopy Reviews* **2005**, *40*, 103.

**Table S3.** Fitting parameters for the spectra in the SSP polarization combination.

| Temp [°C] | $A_1$ | $\omega_1$ | $\Gamma_1$ | $A_2$  | $\omega_2$ | $\Gamma_2$ | $A_3$ | $\omega_3$ | $\Gamma_3$ |
|-----------|-------|------------|------------|--------|------------|------------|-------|------------|------------|
| -38       | 10    | 3122       | 105        | -0.093 | 3240       | 35         | 0.16  | 3361       | 25         |
| -28       | 11    | 3136       | 114        | -0.007 | 3240       | 35         | 0.19  | 3359       | 27         |
| -20       | 11    | 3140       | 123        | 0.017  | 3240       | 35         | 0.20  | 3360       | 30         |
| -10       | 10    | 3139       | 138        | 0.079  | 3240       | 35         | 0.13  | 3359       | 27         |
| -5.0      | 8.6   | 3155       | 126        | 0.28   | 3240       | 35         | 0.07  | 3365       | 24         |
| -2.0      | 8.6   | 3162       | 127        | 0.21   | 3240       | 35         | 0.16  | 3375       | 33         |
| -1.0      | 8.7   | 3153       | 130        | 0.15   | 3240       | 35         | 0.08  | 3362       | 21         |
| -0.5      | 9.2   | 3159       | 128        | 0.20   | 3240       | 35         | 0.17  | 3362       | 30         |
| -0.25     | 12    | 3138       | 138        | 0.068  | 3240       | 35         | -0.14 | 3405       | 27         |
| -0.05     | 10    | 3104       | 124        | 3.1    | 3210       | 106        | -4.7  | 3424       | 76         |

| Temp [°C] | $A_4$ | $\omega_4$ | $\Gamma_4$ | $A_5$ | $\omega_5$ | $\Gamma_5$ | $A_6$ | $\omega_6$ | $\Gamma_6$ |
|-----------|-------|------------|------------|-------|------------|------------|-------|------------|------------|
| -38       | 0.74  | 3455       | 52         | -1.4  | 3510       | 90         | -0.53 | 3635       | 46         |
| -20       | 0.77  | 3457       | 56         | -1.6  | 3510       | 90         | -0.77 | 3641       | 53         |
| -28       | 0.76  | 3455       | 52         | -1.5  | 3510       | 90         | -0.56 | 3640       | 46         |
| -10       | 0.38  | 3459       | 47         | -1.5  | 3510       | 90         | -1.0  | 3639       | 60         |
| -5.0      | 0.79  | 3471       | 59         | -1.6  | 3510       | 90         | -0.87 | 3644       | 52         |
| -2.0      | 0.39  | 3466       | 41         | -1.4  | 3510       | 90         | -0.90 | 3646       | 54         |
| -1.0      | 1.0   | 3478       | 65         | -2.1  | 3510       | 90         | -0.86 | 3644       | 51         |
| -0.5      | 0.89  | 3474       | 61         | -2.0  | 3510       | 90         | -0.86 | 3645       | 53         |
| -0.25     | -1.1  | 3430       | 63         | -1.5  | 3510       | 90         | -1.0  | 3630       | 68         |
| -0.05     | -0.09 | 3470       | 23         | -1.6  | 3510       | 90         | -1.4  | 3641       | 70         |

| Temp [°C] | $A_{NR}$ | $A_1/\Gamma_1$ | $A_2/\Gamma_2$ | $A_3/\Gamma_3$ | $A_4/\Gamma_4$ | $A_5/\Gamma_5$ | $A_6/\Gamma_6$ |
|-----------|----------|----------------|----------------|----------------|----------------|----------------|----------------|
| -38       | -0.00021 | 0.10           | -0.0027        | 0.0065         | 0.014          | -0.015         | -0.012         |
| -28       | 0.00059  | 0.10           | -0.00021       | 0.0070         | 0.015          | -0.017         | -0.012         |
| -20       | 0.0005   | 0.086          | 0.00049        | 0.0067         | 0.014          | -0.017         | -0.015         |
| -10       | -0.0027  | 0.069          | 0.0023         | 0.0050         | 0.0080         | -0.017         | -0.017         |
| -5.0      | -0.0019  | 0.068          | 0.0081         | 0.0029         | 0.013          | -0.018         | -0.017         |
| -2.0      | -0.0023  | 0.068          | 0.0061         | 0.0047         | 0.009          | -0.015         | -0.017         |
| -1.0      | -0.0028  | 0.067          | 0.0042         | 0.0040         | 0.015          | -0.023         | -0.017         |
| -0.5      | -0.0022  | 0.072          | 0.0058         | 0.0058         | 0.015          | -0.022         | -0.016         |
| -0.25     | -0.0054  | 0.084          | 0.0020         | -0.0052        | -0.018         | -0.017         | -0.015         |
| -0.05     | 0.00052  | 0.082          | 0.02935        | -0.062         | -0.0042        | -0.017         | -0.020         |

**Table S4.** Fitting parameters for the spectra in the PPP polarization combination.

| Temp [°C] | $A_1$ | $\omega_1$ | $\Gamma_1$ | $A_2$ | $\omega_2$ | $\Gamma_2$ | $A_3$ | $\omega_3$ | $\Gamma_3$ |
|-----------|-------|------------|------------|-------|------------|------------|-------|------------|------------|
| -38       | 28    | 3110       | 133        | 0.60  | 3236       | 27         | -2.6  | 3409       | 64         |
| -28       | 32    | 3116       | 155        | 0.47  | 3237       | 24         | -3.9  | 3405       | 79         |
| -20       | 33    | 3130       | 178        | 0.65  | 3240       | 30         | -5.3  | 3407       | 84         |
| -10       | 28    | 3136       | 177        | 1.22  | 3240       | 43         | -6.6  | 3414       | 89         |
| -5.0      | 27    | 3114       | 192        | 0.67  | 3236       | 42         | -6.6  | 3414       | 84         |
| -2.0      | 28    | 3134       | 188        | 0.50  | 3239       | 38         | -7.3  | 3414       | 88         |
| -1.0      | 28    | 3139       | 185        | 0.29  | 3237       | 31         | -6.4  | 3418       | 91         |
| -0.5      | 29    | 3129       | 188        | 0.15  | 3245       | 35         | -6.0  | 3419       | 83         |
| -0.25     | 43    | 3129       | 188        | -0.57 | 3245       | 35         | -20.5 | 3419       | 83         |
| -0.05     | 43    | 3096       | 172        | 0.01  | 3245       | 35         | -17.9 | 3405       | 70         |

| Temp [°C] | $A_4$ | $\omega_4$ | $\Gamma_4$ | $A_5$ | $\omega_5$ | $\Gamma_5$ | $A_6$ | $\omega_6$ | $\Gamma_6$ |
|-----------|-------|------------|------------|-------|------------|------------|-------|------------|------------|
| -38       | -3.3  | 3494       | 58         | -2.0  | 3552       | 63         | -3.4  | 3635       | 56         |
| -28       | -3.6  | 3499       | 71         | -2.0  | 3553       | 66         | -3.4  | 3641       | 57         |
| -20       | -3.7  | 3501       | 64         | -1.9  | 3555       | 65         | -4.5  | 3639       | 61         |
| -10       | -2.3  | 3507       | 54         | -2.7  | 3559       | 65         | -4.4  | 3640       | 56         |
| -5.0      | -3.3  | 3503       | 60         | -2.7  | 3560       | 65         | -3.9  | 3637       | 54         |
| -2.0      | -3.3  | 3505       | 60         | -2.7  | 3565       | 65         | -4.0  | 3638       | 55         |
| -1.0      | -2.4  | 3507       | 55         | -2.9  | 3562       | 65         | -4.3  | 3639       | 55         |
| -0.5      | -2.6  | 3507       | 55         | -2.9  | 3562       | 65         | -4.7  | 3640       | 55         |
| -0.25     | -4.1  | 3507       | 55         | 2.7   | 3562       | 65         | -2.0  | 3630       | 41         |
| -0.05     | -6.1  | 3463       | 58         | -5.2  | 3538       | 68         | -2.7  | 3625       | 43         |

| Temp [°C] | $A_{NR}$ | $A_1/\Gamma_1$ | $A_2/\Gamma_2$ | $A_3/\Gamma_3$ | $A_4/\Gamma_4$ | $A_5/\Gamma_5$ | $A_6/\Gamma_6$ |
|-----------|----------|----------------|----------------|----------------|----------------|----------------|----------------|
| -38       | -0.013   | 0.21           | 0.022          | -0.041         | -0.057         | -0.032         | -0.061         |
| -28       | -0.013   | 0.21           | 0.019          | -0.050         | -0.051         | -0.026         | -0.060         |
| -20       | -0.015   | 0.19           | 0.022          | -0.063         | -0.057         | -0.029         | -0.074         |
| -10       | -0.020   | 0.16           | 0.028          | -0.074         | -0.042         | -0.042         | -0.078         |
| -5.0      | -0.024   | 0.14           | 0.016          | -0.079         | -0.056         | -0.042         | -0.072         |
| -2.0      | -0.023   | 0.15           | 0.013          | -0.084         | -0.055         | -0.042         | -0.073         |
| -1.0      | -0.021   | 0.15           | 0.0095         | -0.070         | -0.043         | -0.045         | -0.079         |
| -0.5      | -0.025   | 0.16           | 0.0044         | -0.073         | -0.047         | -0.045         | -0.085         |
| -0.25     | 0.011    | 0.23           | -0.016         | -0.248         | -0.074         | 0.042          | -0.050         |
| -0.05     | 0.0089   | 0.25           | 0.00029        | -0.257         | -0.105         | -0.076         | -0.062         |

**Table S5.** Fitting parameters for the spectra in the SPS polarization combination.

| Temp [°C] | $A_1$ | $\omega_1$ | $\Gamma_1$ | $A_2$ | $\omega_2$ | $\Gamma_2$ | $A_3$ | $\omega_3$ | $\Gamma_3$ |
|-----------|-------|------------|------------|-------|------------|------------|-------|------------|------------|
| -38       | 1.4   | 3140       | 150        | 6.4   | 3250       | 106        | 3.7   | 3442       | 118        |
| -28       | 0.012 | 3140       | 150        | 6.2   | 3261       | 105        | 4.2   | 3451       | 125        |
| -20       | 0.096 | 3140       | 150        | 5.9   | 3264       | 106        | 5.0   | 3447       | 129        |
| -10       | -1.9  | 3140       | 150        | 3.9   | 3278       | 105        | 5.6   | 3469       | 152        |
| -5.0      | -2.2  | 3140       | 150        | 3.3   | 3288       | 105        | 6.9   | 3491       | 162        |
| -2.0      | -2.4  | 3140       | 150        | 3.8   | 3289       | 111        | 6.4   | 3495       | 146        |
| -1.0      | -2.5  | 3140       | 150        | 3.5   | 3294       | 101        | 6.8   | 3491       | 146        |
| -0.5      | -2.5  | 3140       | 150        | 3.8   | 3289       | 102        | 7.2   | 3489       | 151        |
| -0.25     | -7.3  | 3140       | 150        | 7.4   | 3327       | 132        | 5.6   | 3478       | 132        |
| -0.05     | -9.0  | 3140       | 150        | 4.1   | 3390       | 108        | 5.6   | 3509       | 117        |

| Temp [°C] | $A_4$ | $\omega_4$ | $\Gamma_4$ | $A_{NR}$ | $A_1/\Gamma_1$ | $A_2/\Gamma_2$ | $A_3/\Gamma_3$ | $A_4/\Gamma_4$ |
|-----------|-------|------------|------------|----------|----------------|----------------|----------------|----------------|
| -38       | 0.58  | 3615       | 42         | 0.0059   | 0.0092         | 0.060          | 0.031          | 0.014          |
| -28       | 0.58  | 3619       | 41         | 0.0072   | 0.0001         | 0.059          | 0.033          | 0.014          |
| -20       | 0.64  | 3617       | 43         | 0.0080   | 0.0006         | 0.055          | 0.039          | 0.015          |
| -10       | 0.76  | 3628       | 47         | 0.0096   | 0.013          | 0.037          | 0.037          | 0.016          |
| -5.0      | 1.2   | 3635       | 50         | 0.012    | 0.015          | 0.031          | 0.043          | 0.024          |
| -2.0      | 1.1   | 3634       | 50         | 0.011    | 0.016          | 0.034          | 0.043          | 0.022          |
| -1.0      | 1.5   | 3634       | 53         | 0.013    | 0.017          | 0.035          | 0.047          | 0.027          |
| -0.5      | 1.2   | 3633       | 51         | 0.011    | 0.017          | 0.038          | 0.047          | 0.024          |
| -0.25     | 2.7   | 3643       | 78         | 0.022    | 0.048          | 0.056          | 0.042          | 0.035          |
| -0.05     | 2.8   | 3648       | 70         | 0.021    | 0.060          | 0.038          | 0.048          | 0.040          |

- (1) Liljeblad, J. F. D.; Tyrode, E. *Journal of Physical Chemistry C* **2012**, *116*, 22893.
- (2) Max, J. J.; Chapados, C. *J Chem Phys* **2009**, *131*, 184505.
- (3) Warren, S. G.; Brandt, R. E. *J Geophys Res-Atmos* **2008**, *113*.
- (4) Malitson, I. H. *J. Opt. Soc. Am.* **1965**, *55*, 1205.
- (5) Lambert, A. G.; Davies, P. B.; Neivandt, D. J. *Applied Spectroscopy Reviews* **2005**, *40*,

103.
